# Supplementary material
Source: Springer Nature journal article supplement (https://www.springermedizin.de/resource/supplementary/13561_2011_24_MOESM2_ESM.pdf/9687304)

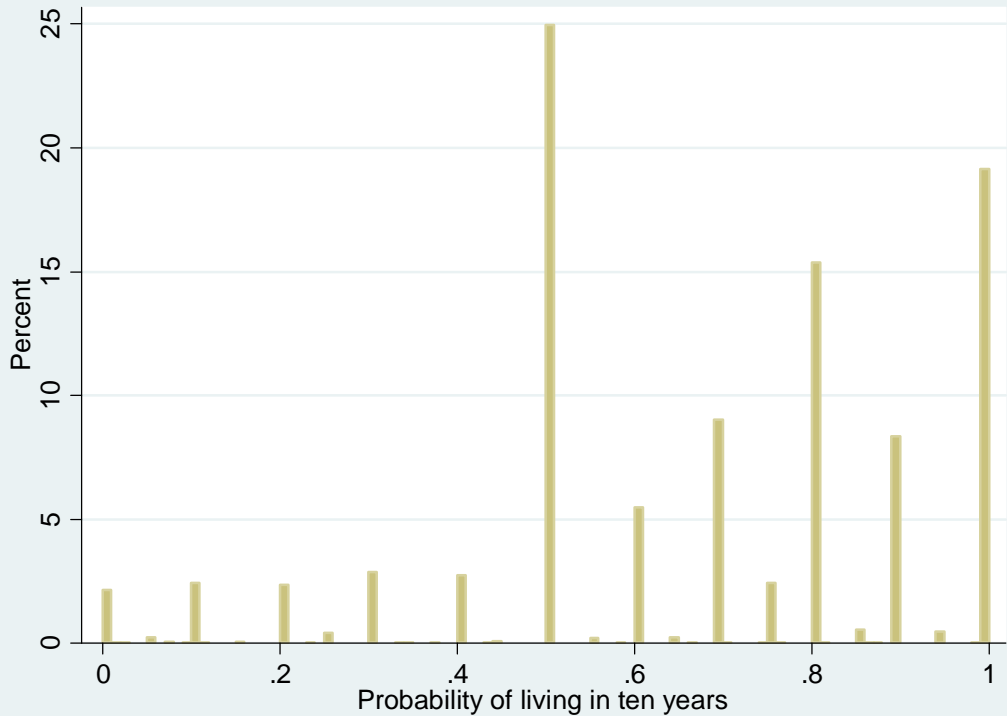

Supplement: MOESM2 [file 9687304]
